# Supplementary material for: A rare structural characterisation of the phosphomolybdate lacunary anion, [PMo11O39]7−. Crystal structures of the Ln(iii) complexes, (NH4)11[Ln(PMo11O39)2]·16H2O (Ln = CeIII, SmIII, DyIIIor LuIII)
Source: Royal Society of Chemistry journal article supplement (doi:10.1039/b301995k), 2003-01-01

# INFRA-RED SPECTRA

Solid IR spectrum (KBr disc) of **1**

Solid IR spectrum (KBr disc) of **2**

Solid IR spectrum of **3**

Solid IR spectrum (KBr disc) of **4**

Aqueous IR spectrum (ATR) of **1**

Aqueous IR spectrum (ATR) of **2**

Aqueous IR spectrum (ATR) of **3**

Aqueous IR spectrum (ATR) of **4**

# SELECTED UV/VIS/NIR SPECTRA

Aqueous solution UV/vis/nIR spectrum of **1** (diluted by a factor of 1000) showing the OMo charge transfer transition of the polyoxometalate. There are no f-f transitions because Ce(III) has a 4f0 electronic configuration.

Aqueous solution UV/vis/nIR spectrum of **2**

Aqueous solution UV/vis/nIR spectrum of **3**

Aqueous solution UV/vis/nIR spectrum of **4** is not included here as there are no characteristic f-f transitions because Lu(III) has a 4f14 full shell electronic configuration.

Diffuse reflectance solid state UV/vis/nIR spectrum of **3**

Solid state UV/vis/nIR spectrum of **3** showing the charge transfer band of the polyoxometalate.

Only a charge transfer band was observed in the solid state UV/vis/nIR spectra of **1, 2, and 4**.

**RAMAN SPECTRA**

Solid Raman spectrum of **1**.

Solid Raman spectrum of **2**.

Solid Raman spectrum of **3**.

Solid Raman spectrum of **4**.

Aqueous solution Raman spectrum of **1**.

Aqueous solution Raman spectrum of **2**.

Aqueous solution Raman spectrum of **3**.

Aqueous solution Raman spectrum of **4**.

**TGA’s**

TGA curve of **1**.


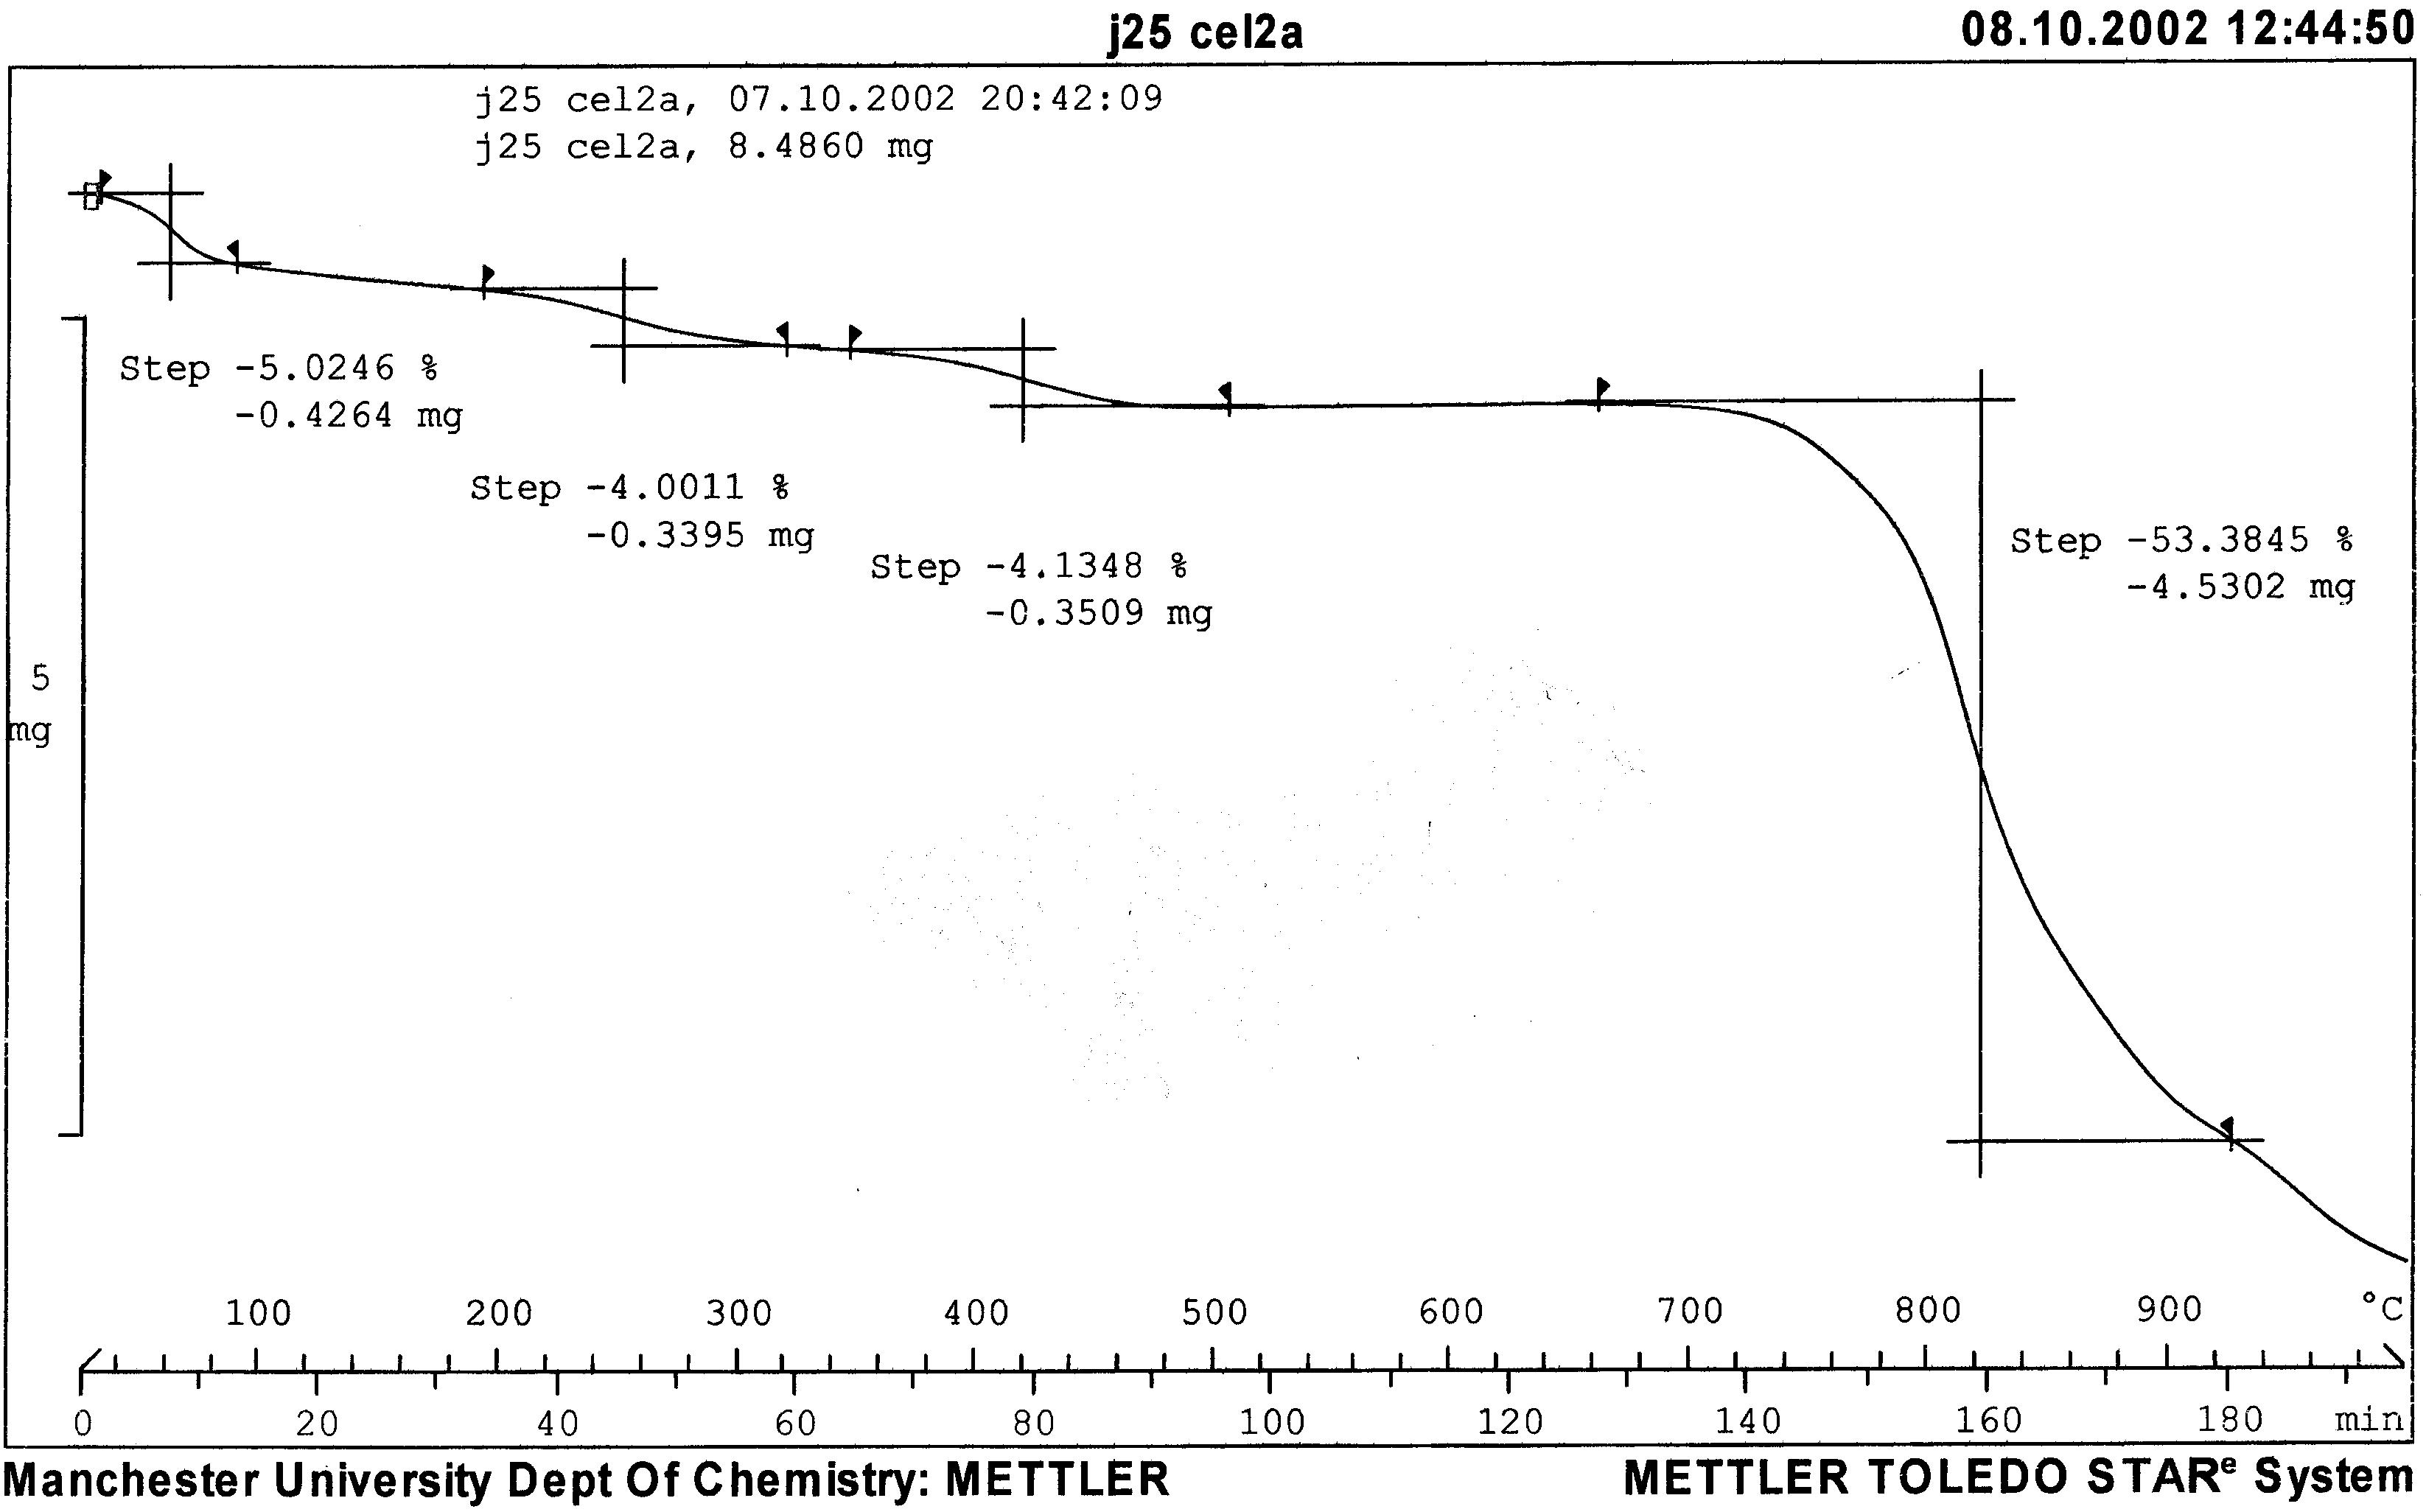


TGA curve of **2**.


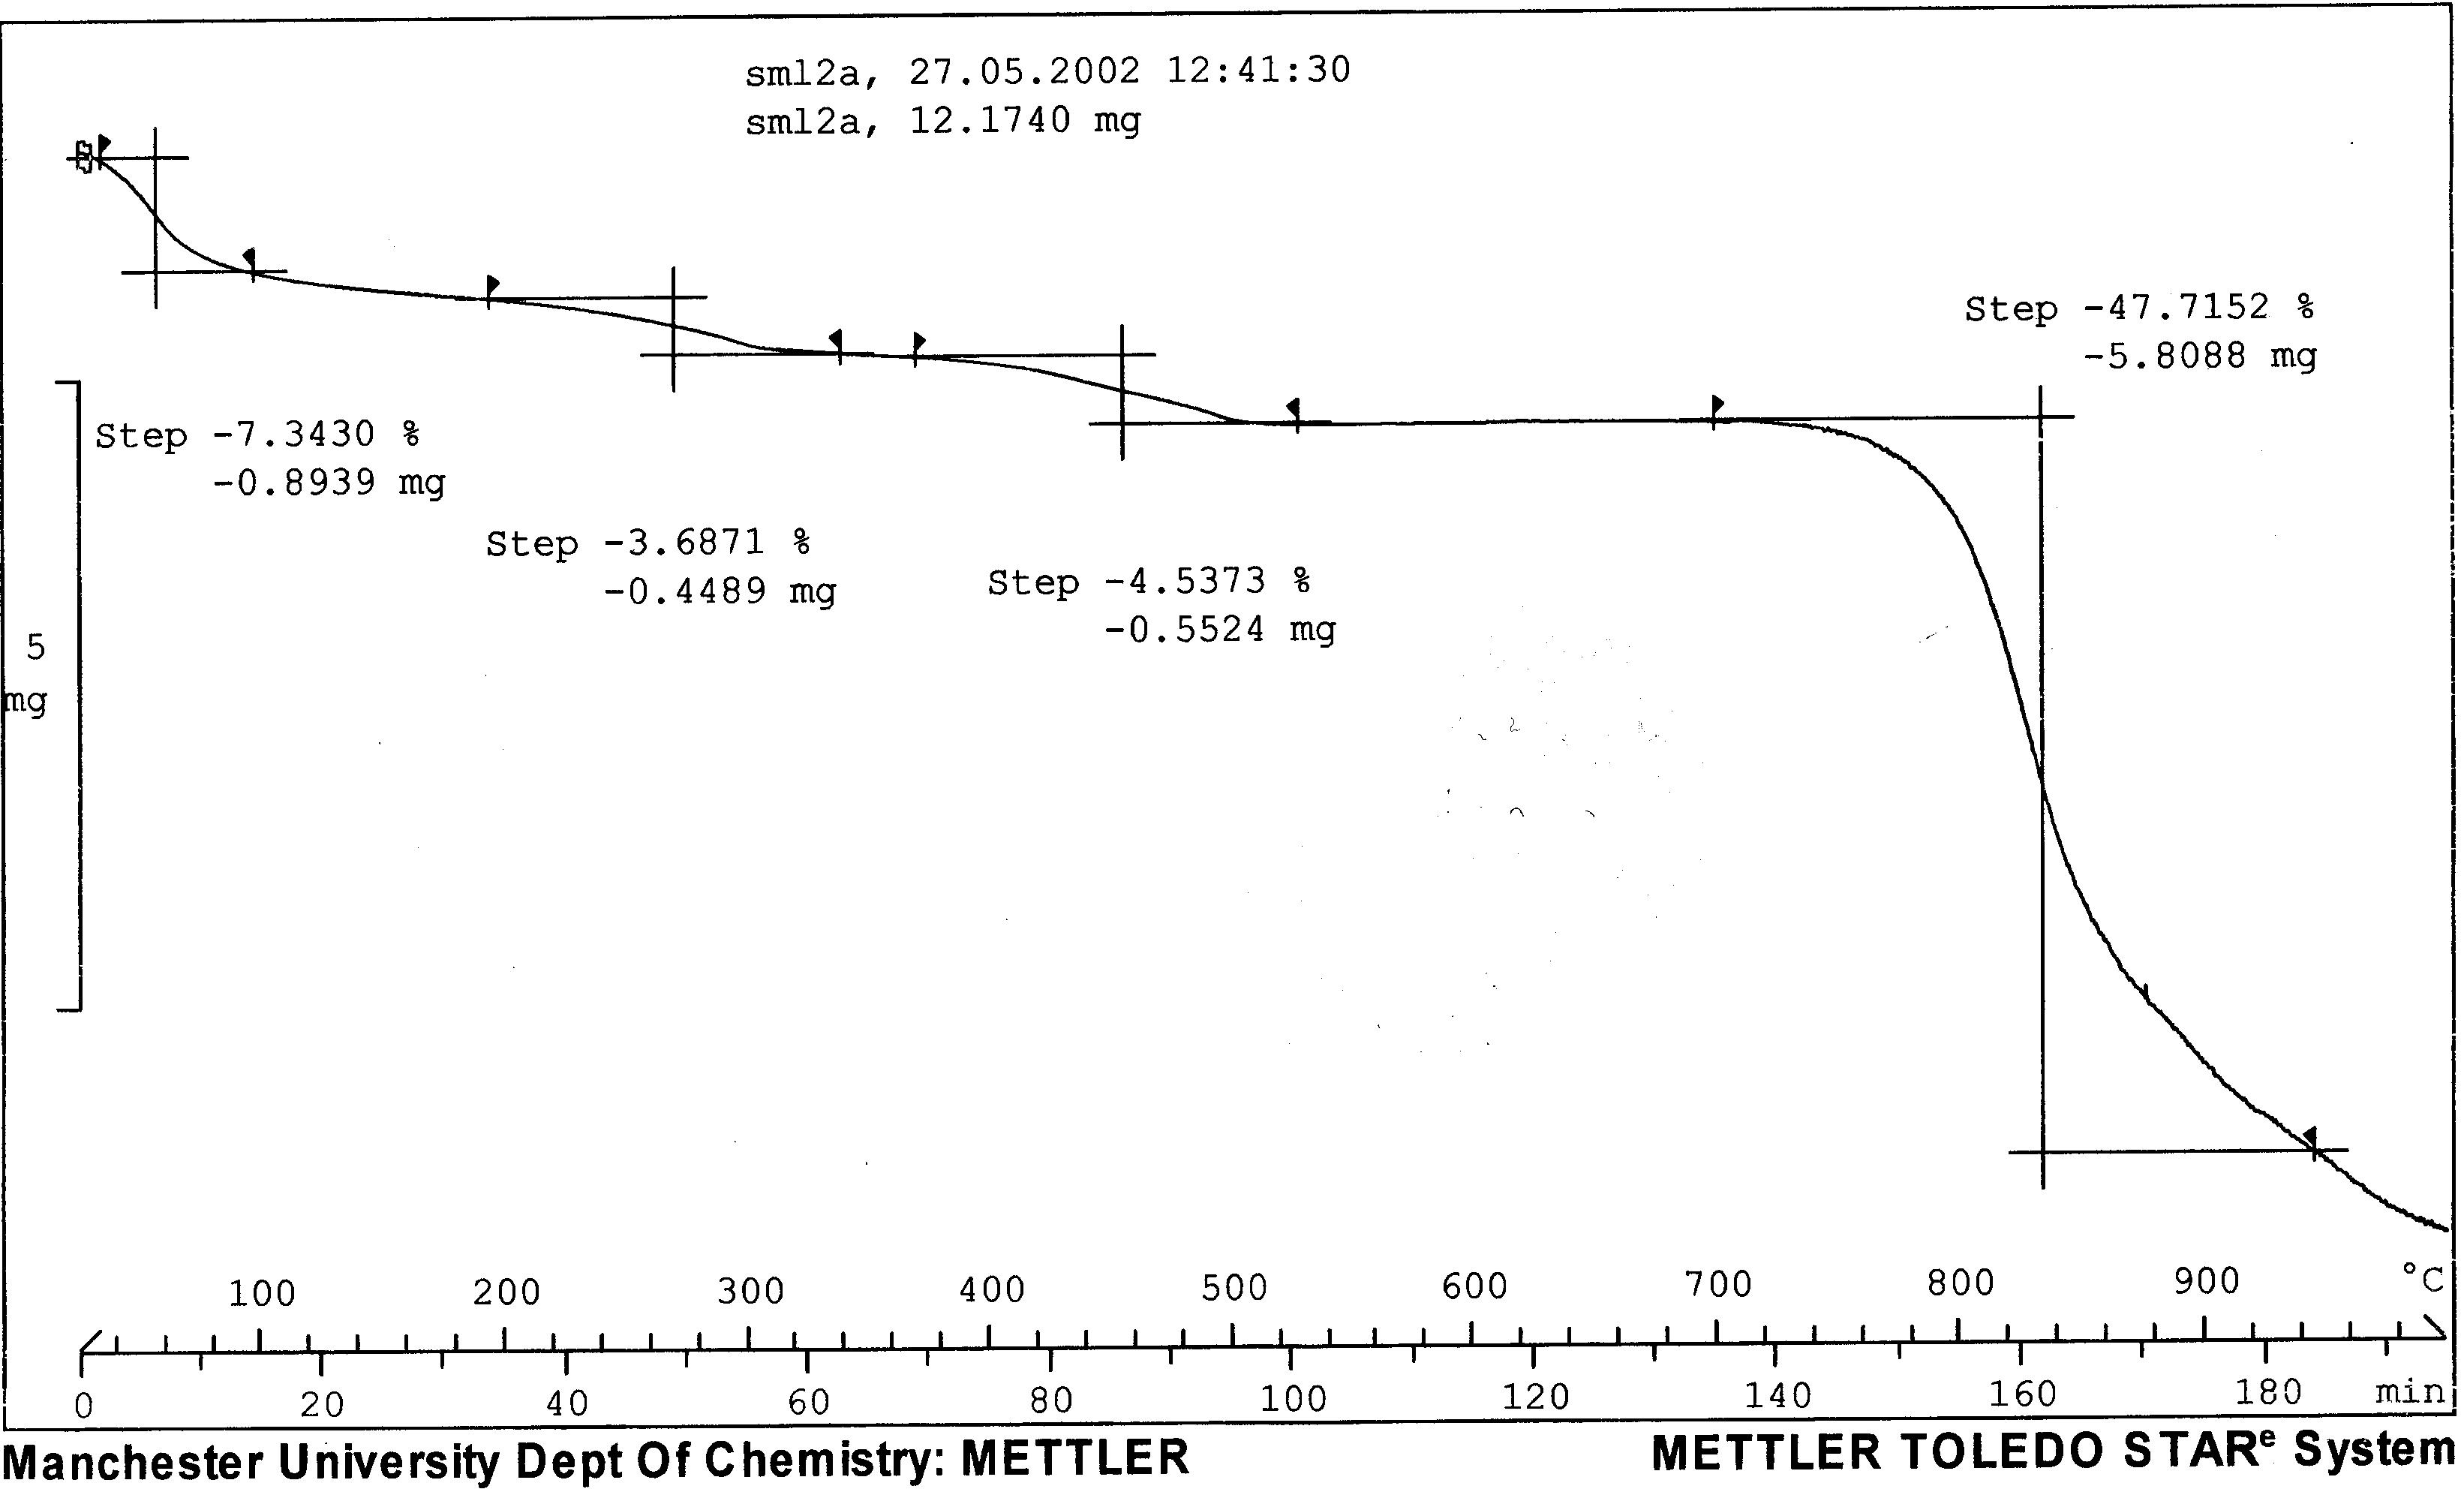


TGA curve of **3**.


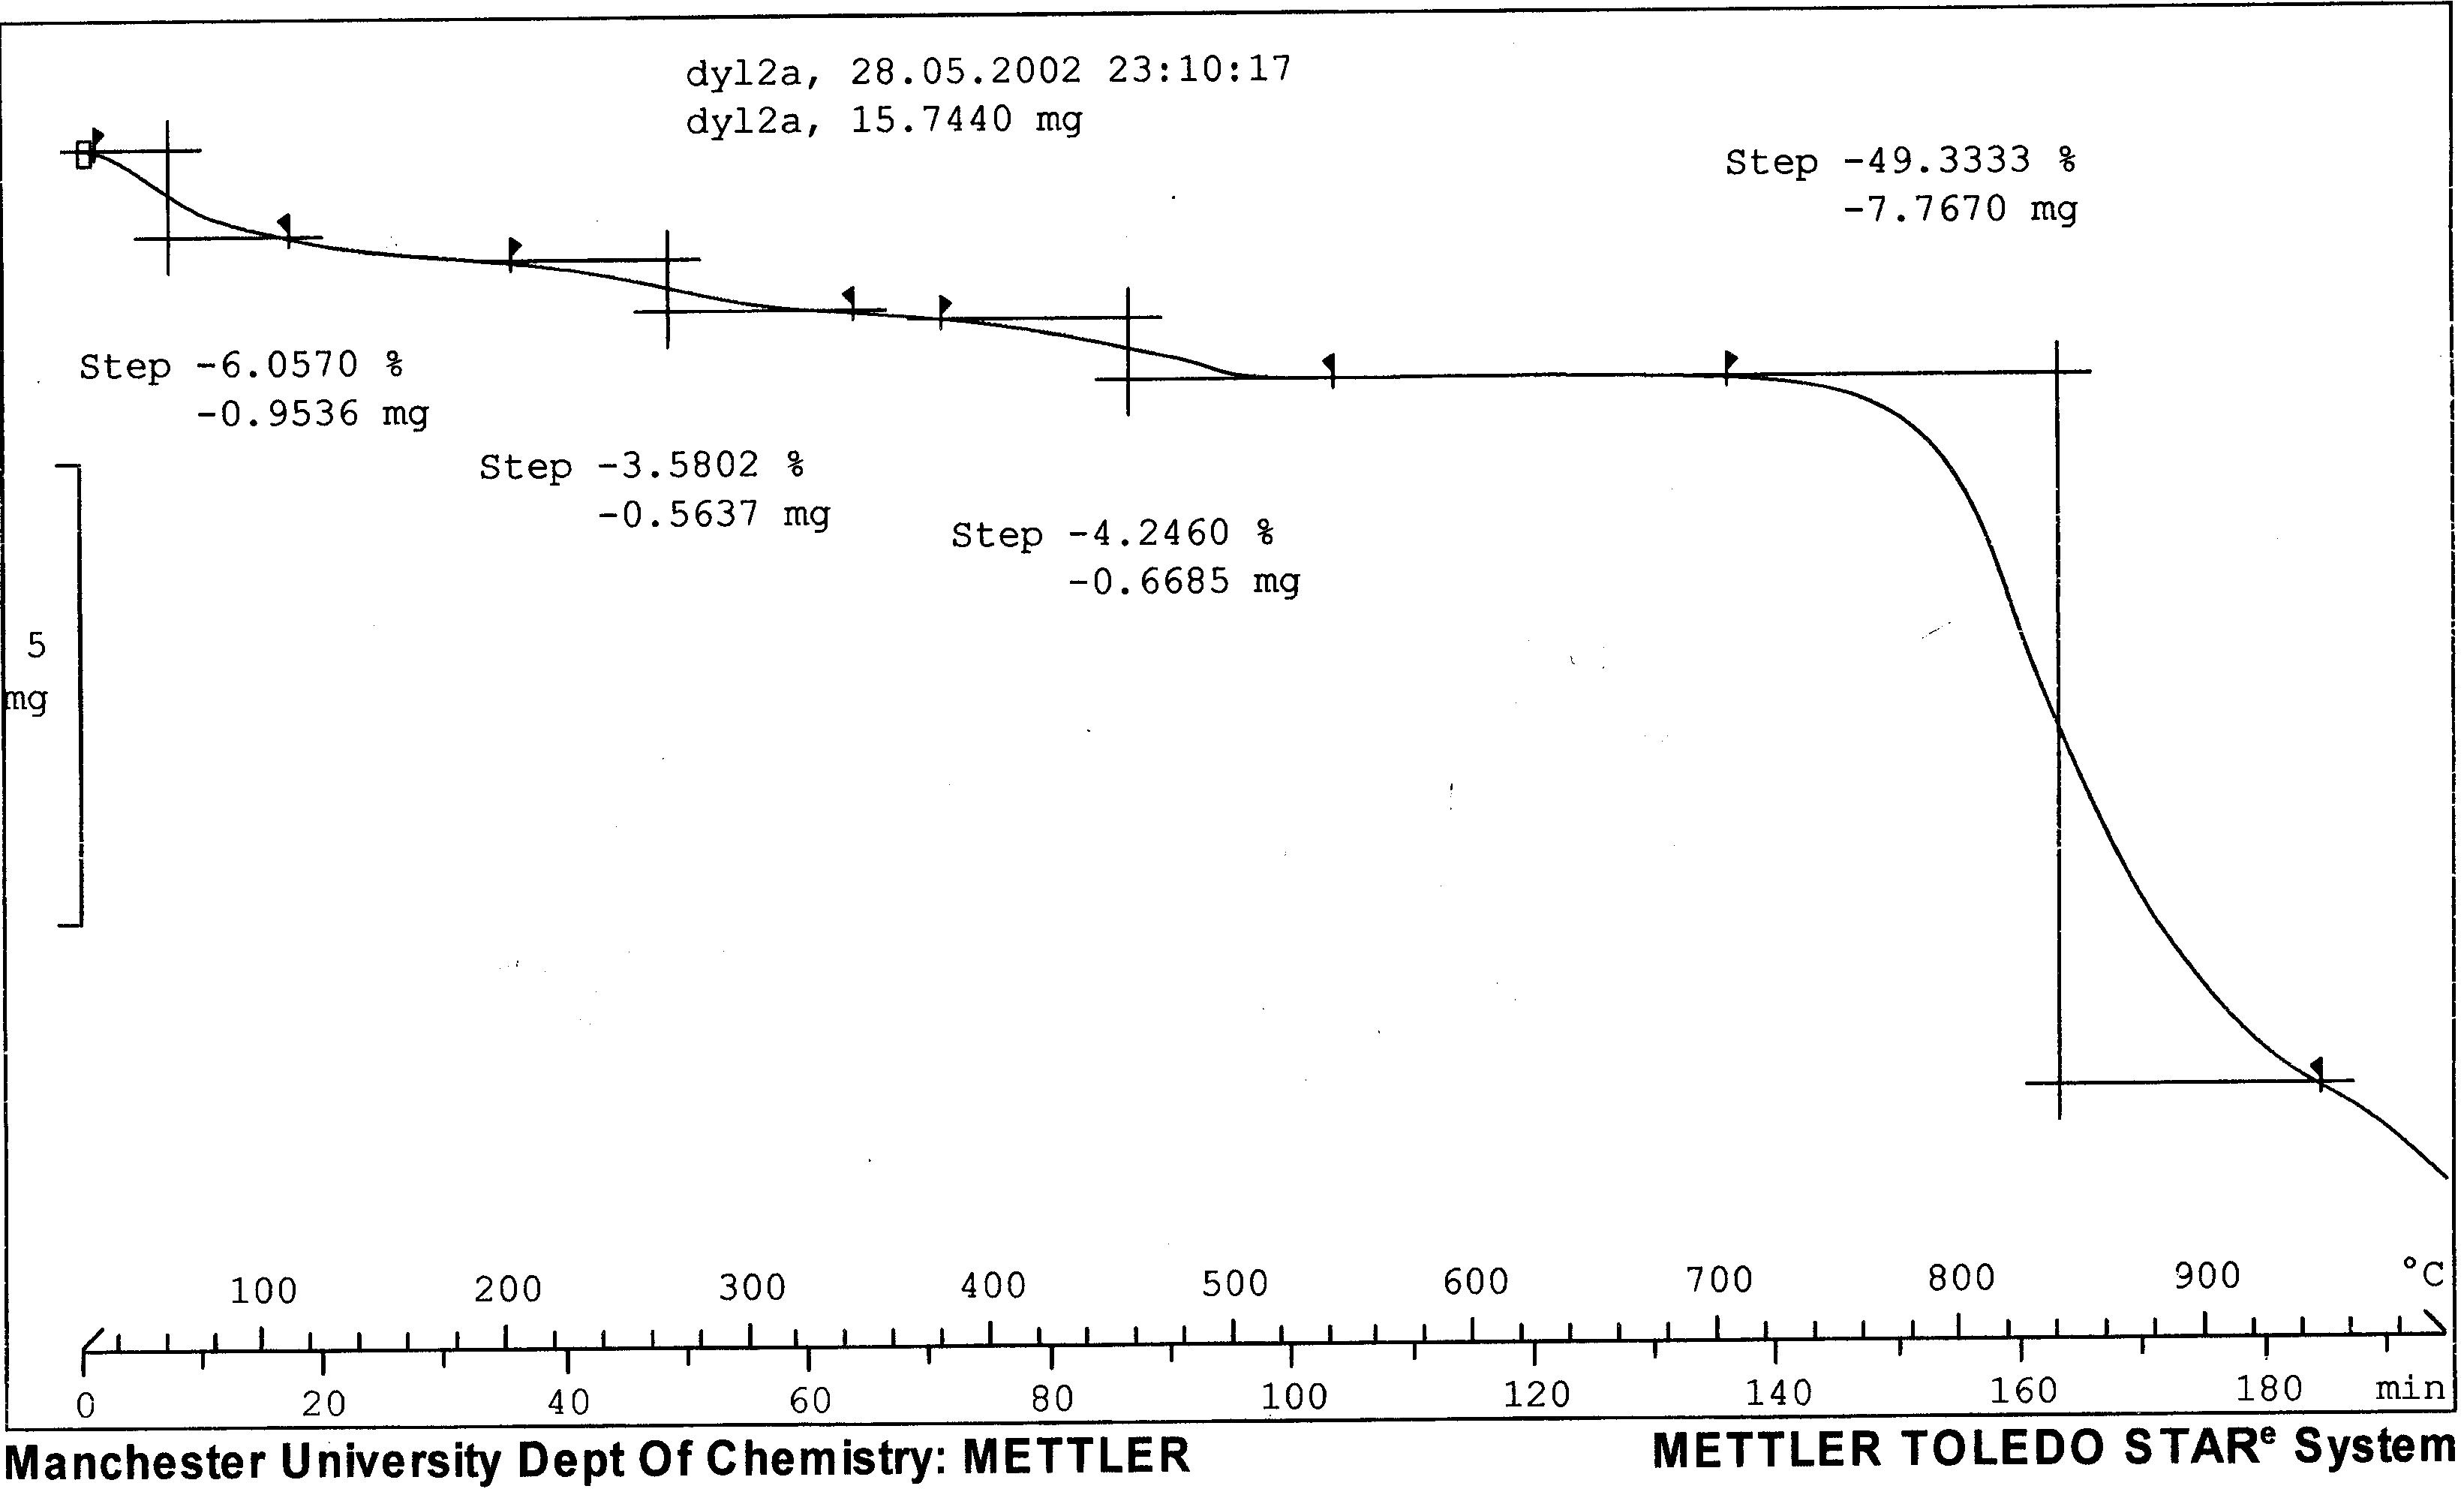


TGA curve of **4**


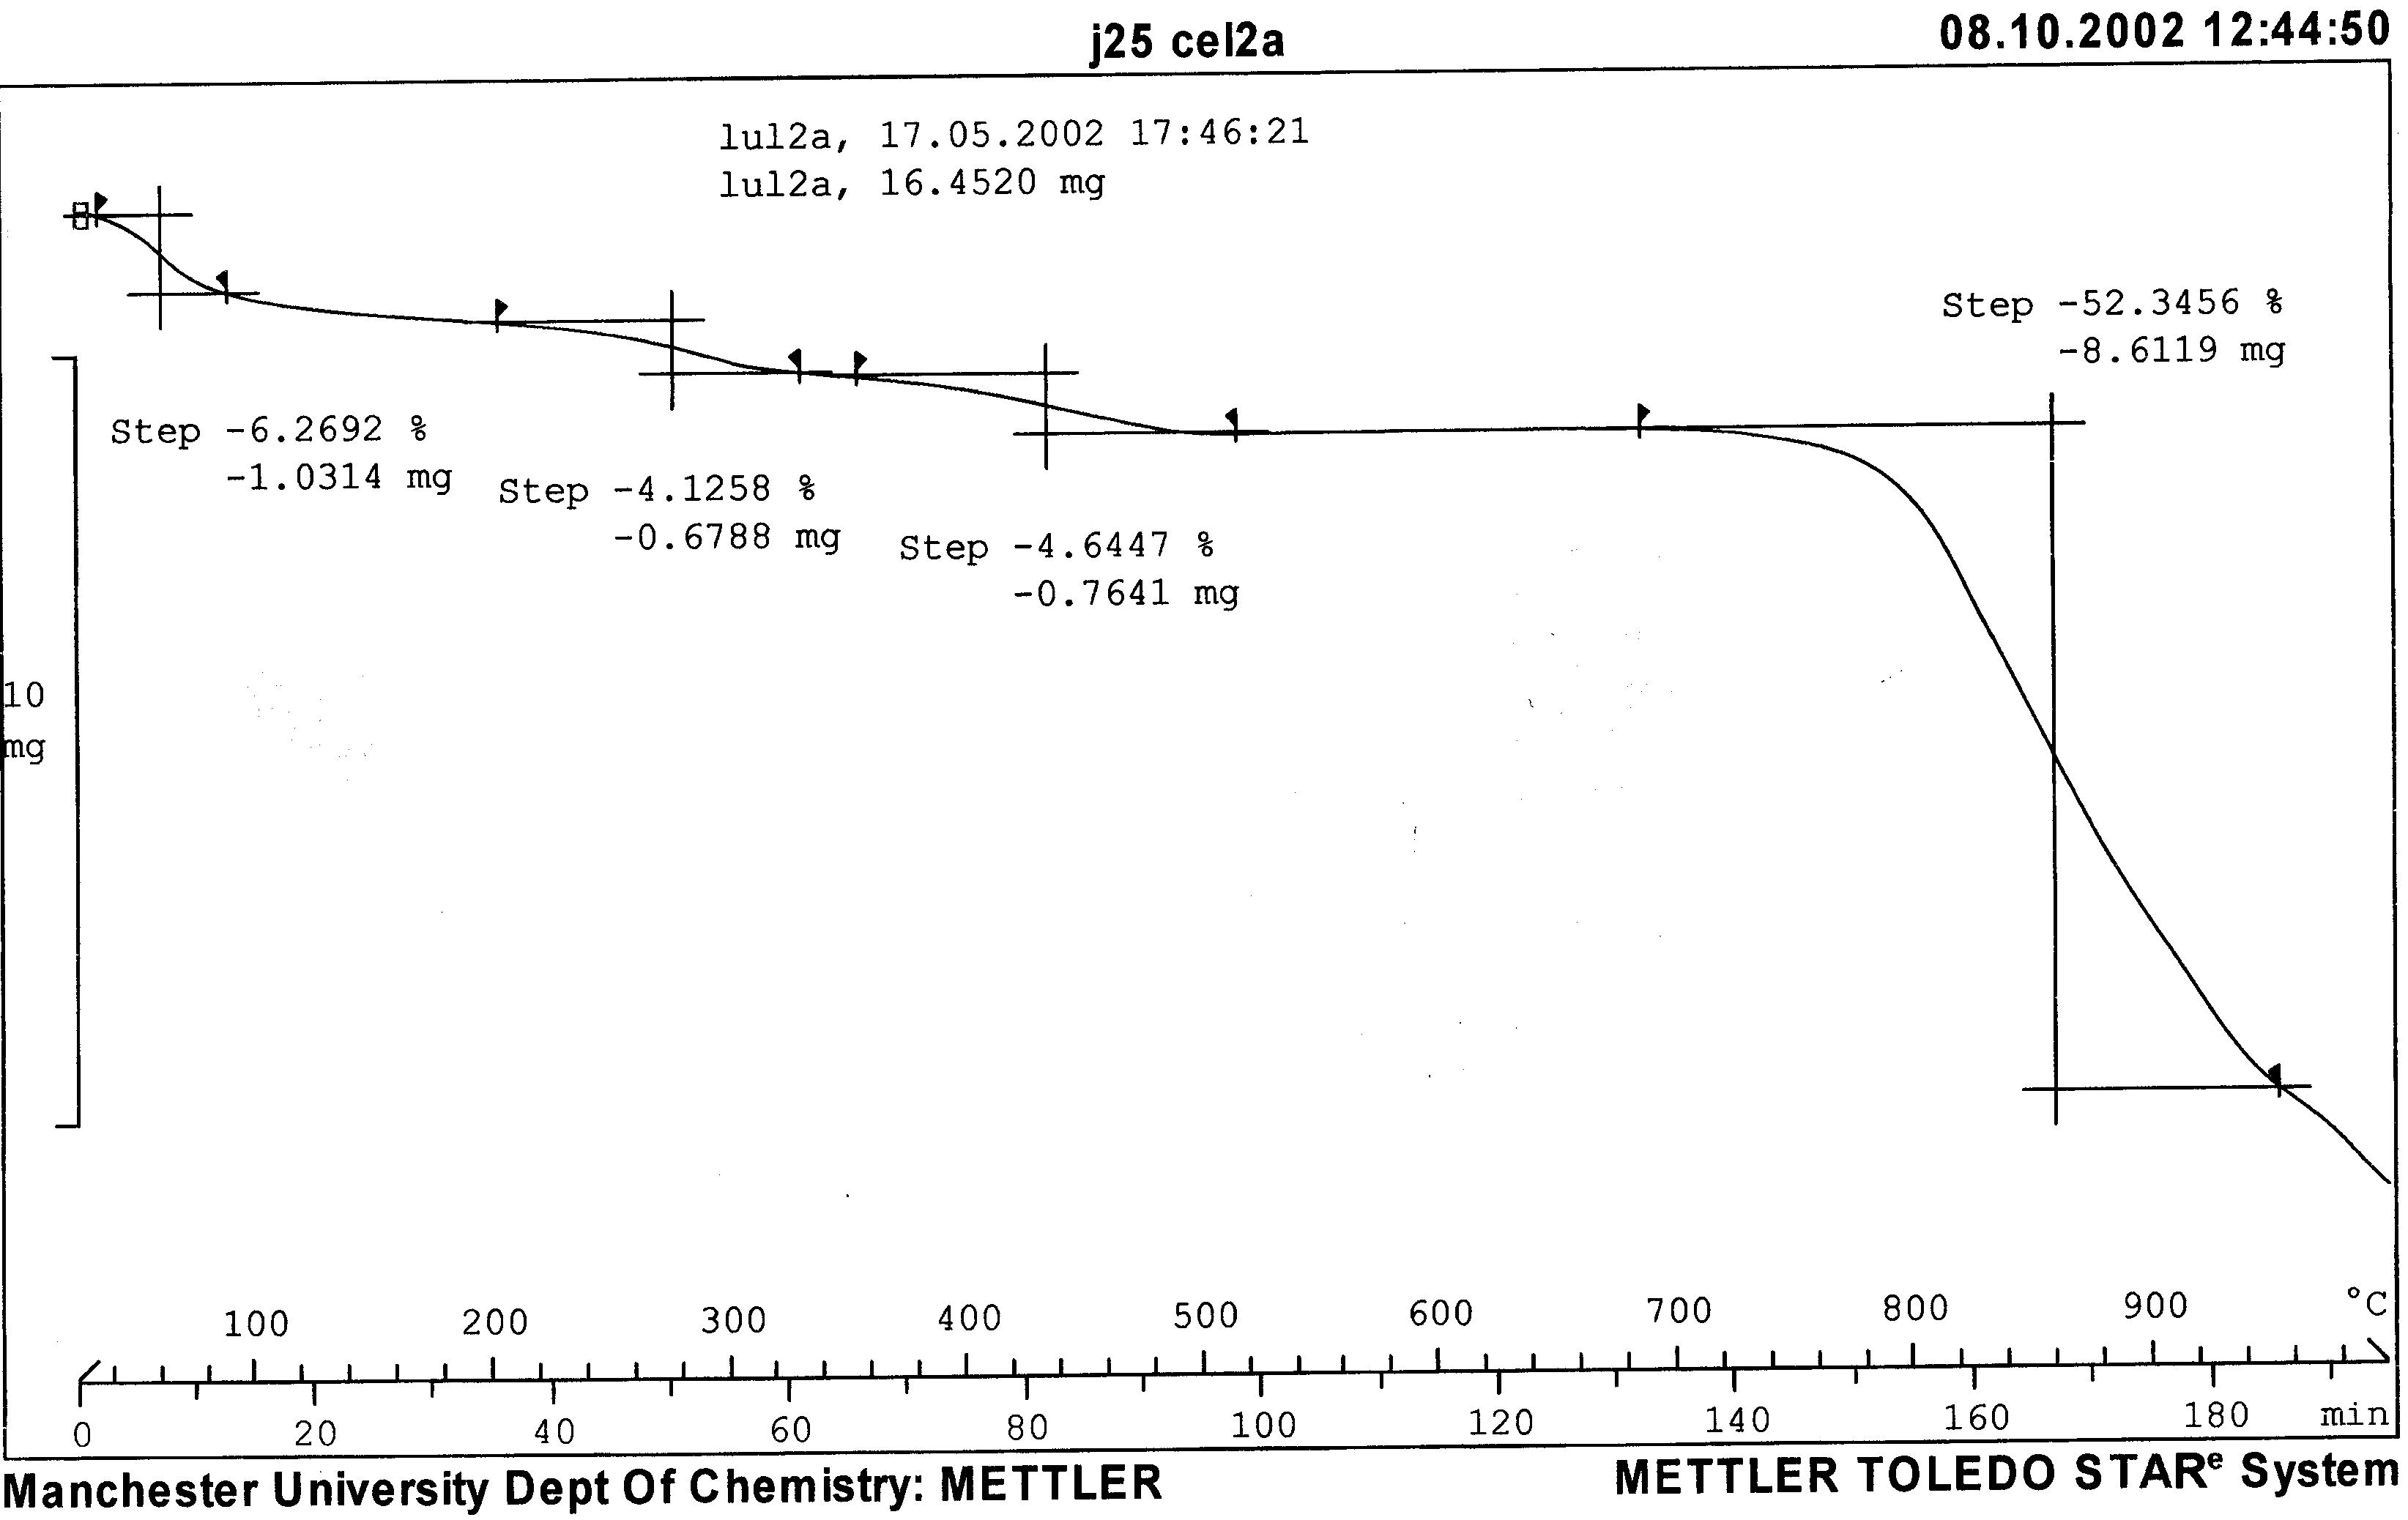

Supplement: b301995k.doc [file b301995k.doc]
